# Supplementary material for: NiCo2O4 nanoarray on CNT sponge: a bifunctional oxygen electrode material for rechargeable Zn–air batteries
Source: Royal Society of Chemistry journal article supplement (doi:10.1039/c9na00311h), 2019-01-01
Supplement: c9na00311h1.pdf [file c9na00311h1.pdf]

## Supporting Information

### **NiCo<sub>2</sub>O<sub>4</sub> Nanoarray on CNT Sponge: a Bifunctional Oxygen Electrode Material for Rechargeable Zn-Air Battery**

Pranav K. Gangadharan,<sup>a,b</sup> Siddheshwar N. Bhangre,<sup>a,b</sup> Nasrin Kabeer,<sup>a</sup> Rajith Illathvalappil,<sup>a,b</sup> & Sreekumar Kurungot<sup>\*a,b</sup>

a. Physical and Materials Chemistry Division, CSIR-National Chemical Laboratory, Pune, Maharashtra, India – 411008. E-mail: [k.sreekumar@ncl.res.in](mailto:k.sreekumar@ncl.res.in)

b. Academy of Scientific and Innovative Research (AcSIR), Ghaziabad-201002, India

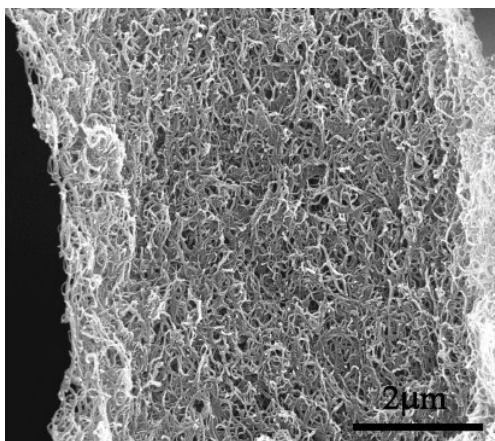

**Figure S1.** High resolution FESEM image of the CNT incorporated melamine sponge (CS).

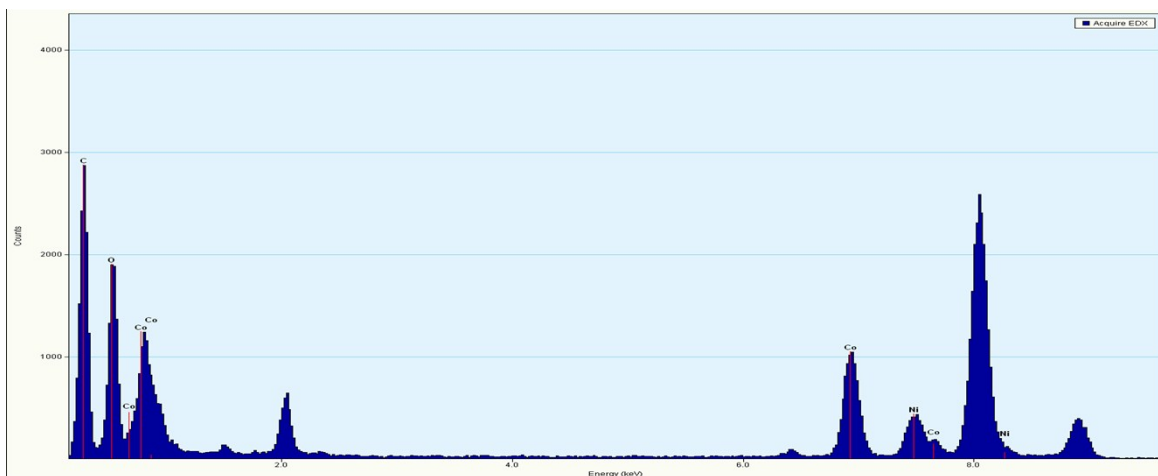

**Figure S2.** EDAX analysis of NCS.

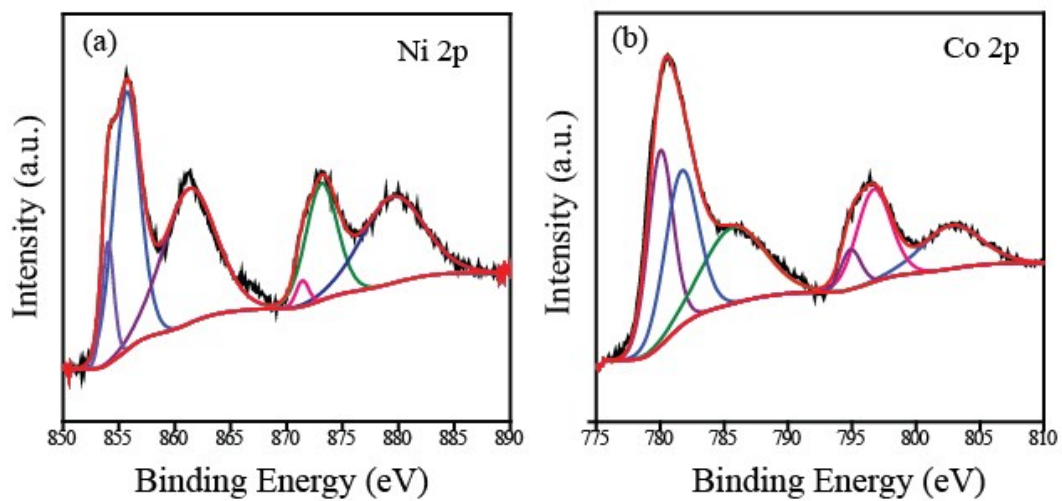

**Figure S3.** Ni 2p (a) and Co 2p (b) XPS spectra of NMS.

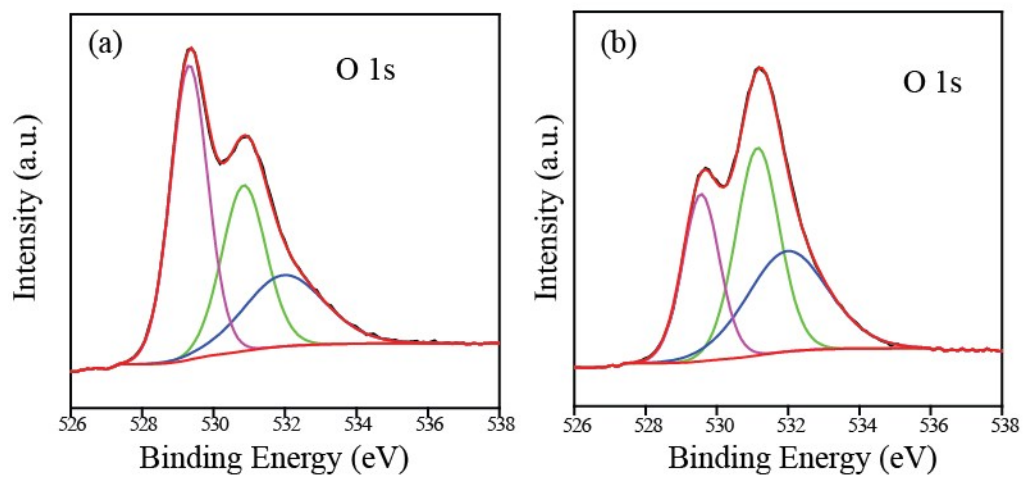

**Figure S4.** O 1s XPS spectra of (a) NCS and (b) NMS.

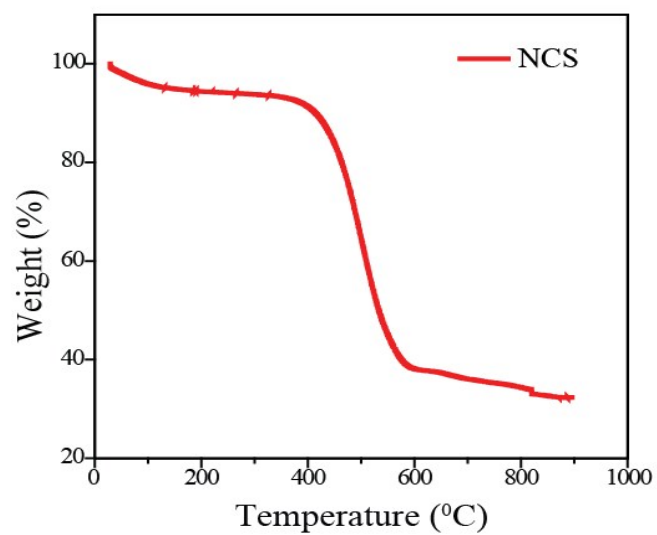

**Figure S5.** TGA profile of NCS in O<sub>2</sub> atmosphere.

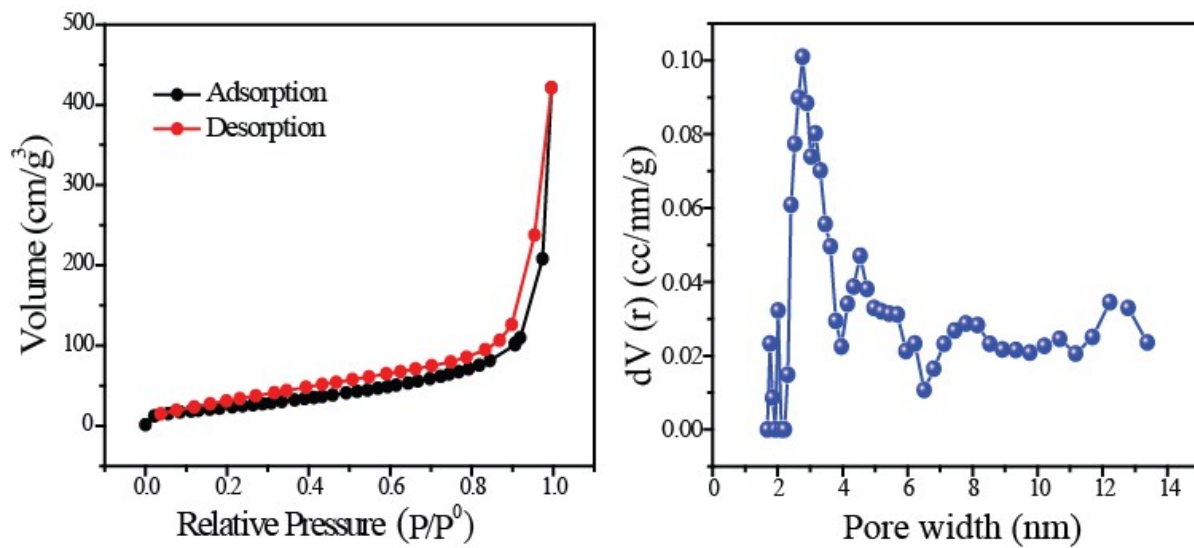

**Figure S6.** BET adsorption isotherm and pore size distribution profile of NCS.

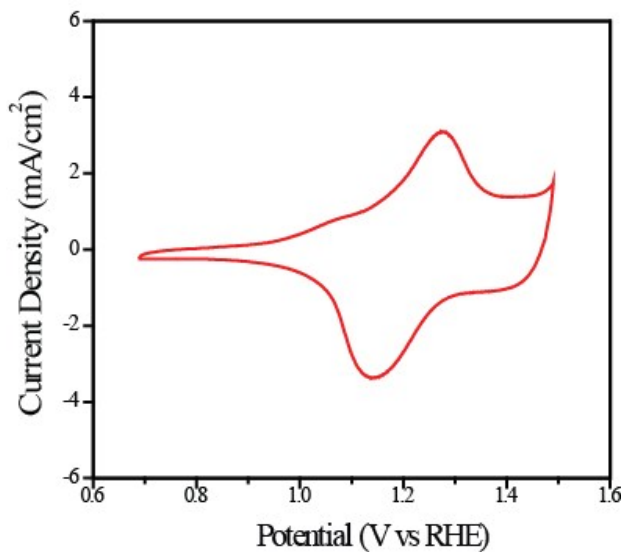

**Figure S7.** Cyclic voltammogram of NCS in N<sub>2</sub>-saturated 1 M KOH.

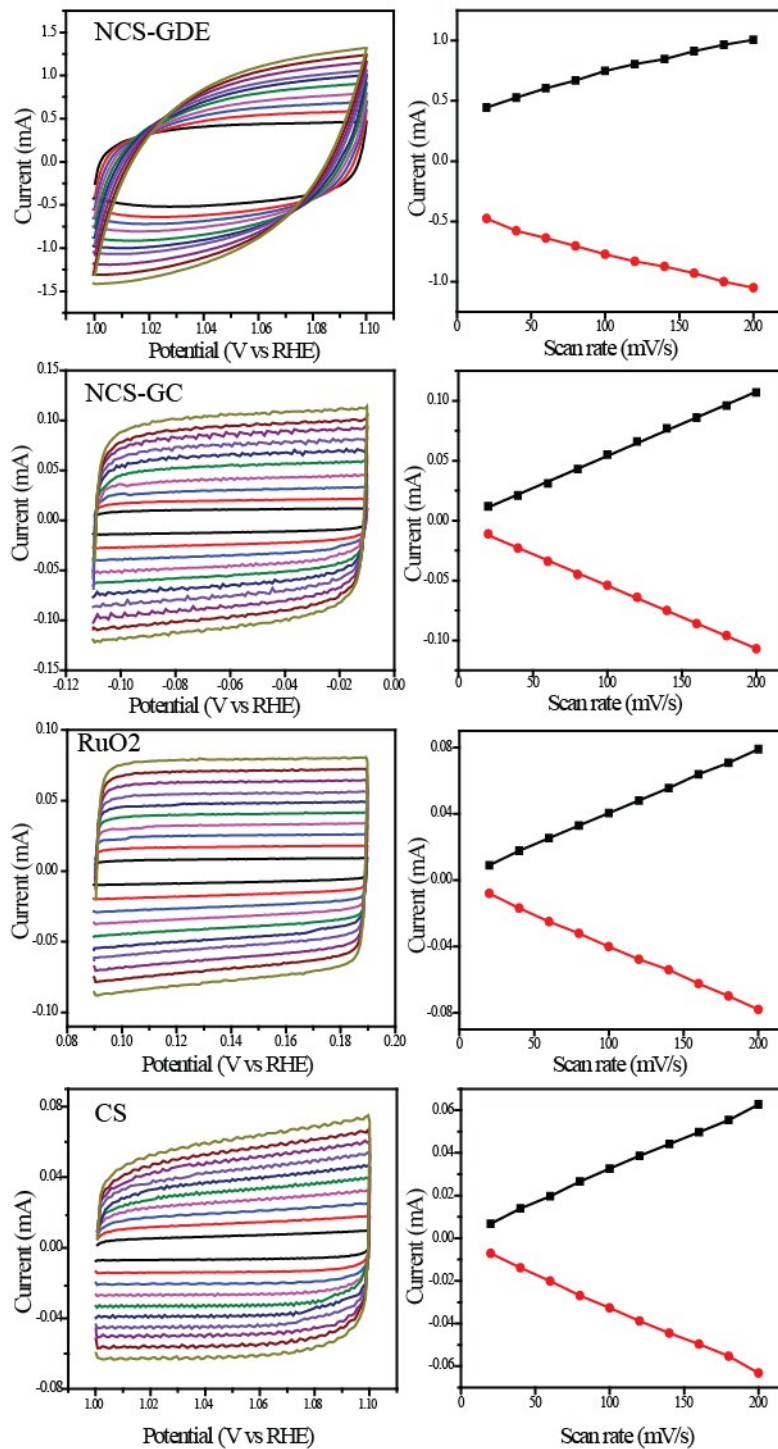

**Figure S8.** Electroactive surface area calculation through double layer method.

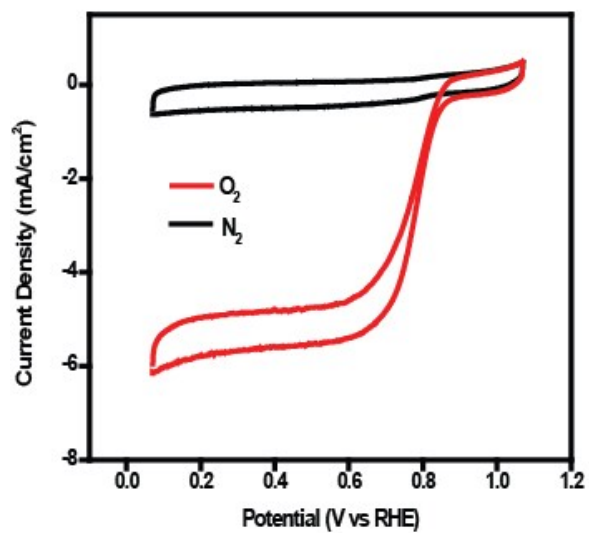

**Figure S9.** Cyclic voltammogram of NCS in O<sub>2</sub>- and N<sub>2</sub>-saturated 0.1 M KOH.

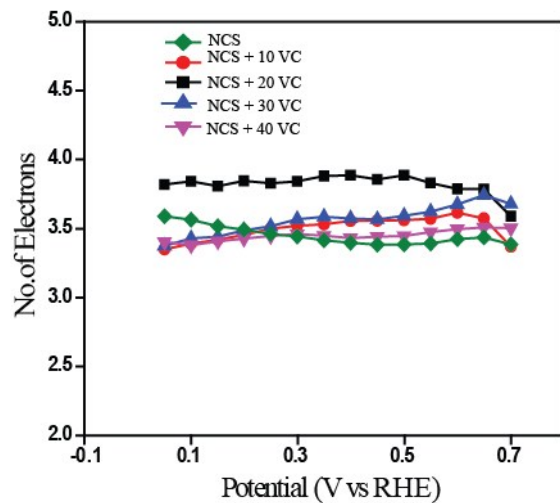

**Figure S10.** The number of electron transfer of oxygen reduction reaction calculated as a function of the electrode potential from RRDE.

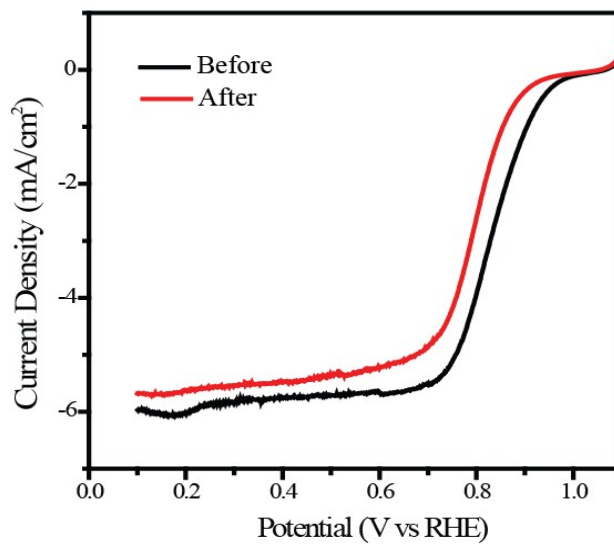

**Figure S11.** LSVs of Pt/C catalyst recorded in 0.1M KOH at an electrode rotation speed of 1600 rpm before and after ADT.



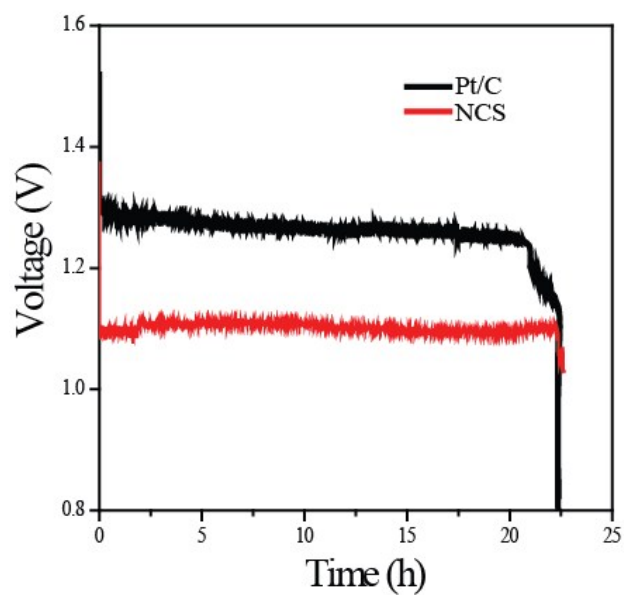

**Figure S12.** Galvanostatic discharge curves of Zn-air batteries with NCS and Pt/C as the cathodes until complete consumption of Zn anode.

$$\text{Faradaic Efficiency } (\varepsilon) = \frac{2 * I r}{I d * N} \quad (\text{S1})$$
